# Supplementary material for: Novel DNA methylation biomarkers show high sensitivity and specificity for blood-based detection of colorectal cancer—a clinical biomarker discovery and validation study
Source: PubMed Central journal article supplement (PMC6854894; doi:10.1186/s13148-019-0757-3), 2019-11-14

# Supplementary Figure 7

Assays used before bisulfite conversion

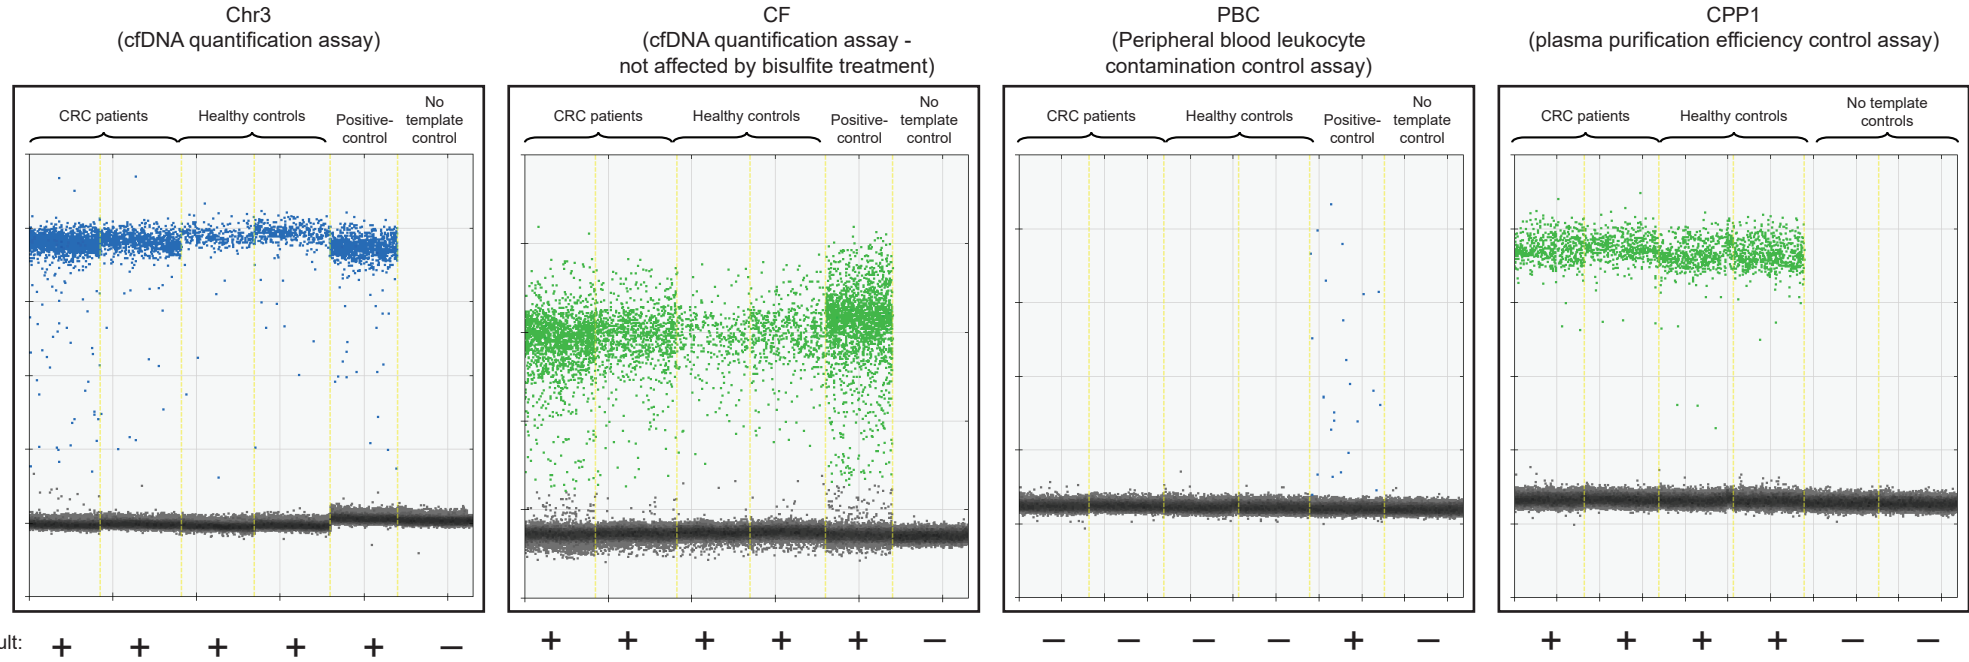

Assays used after bisulfite conversion

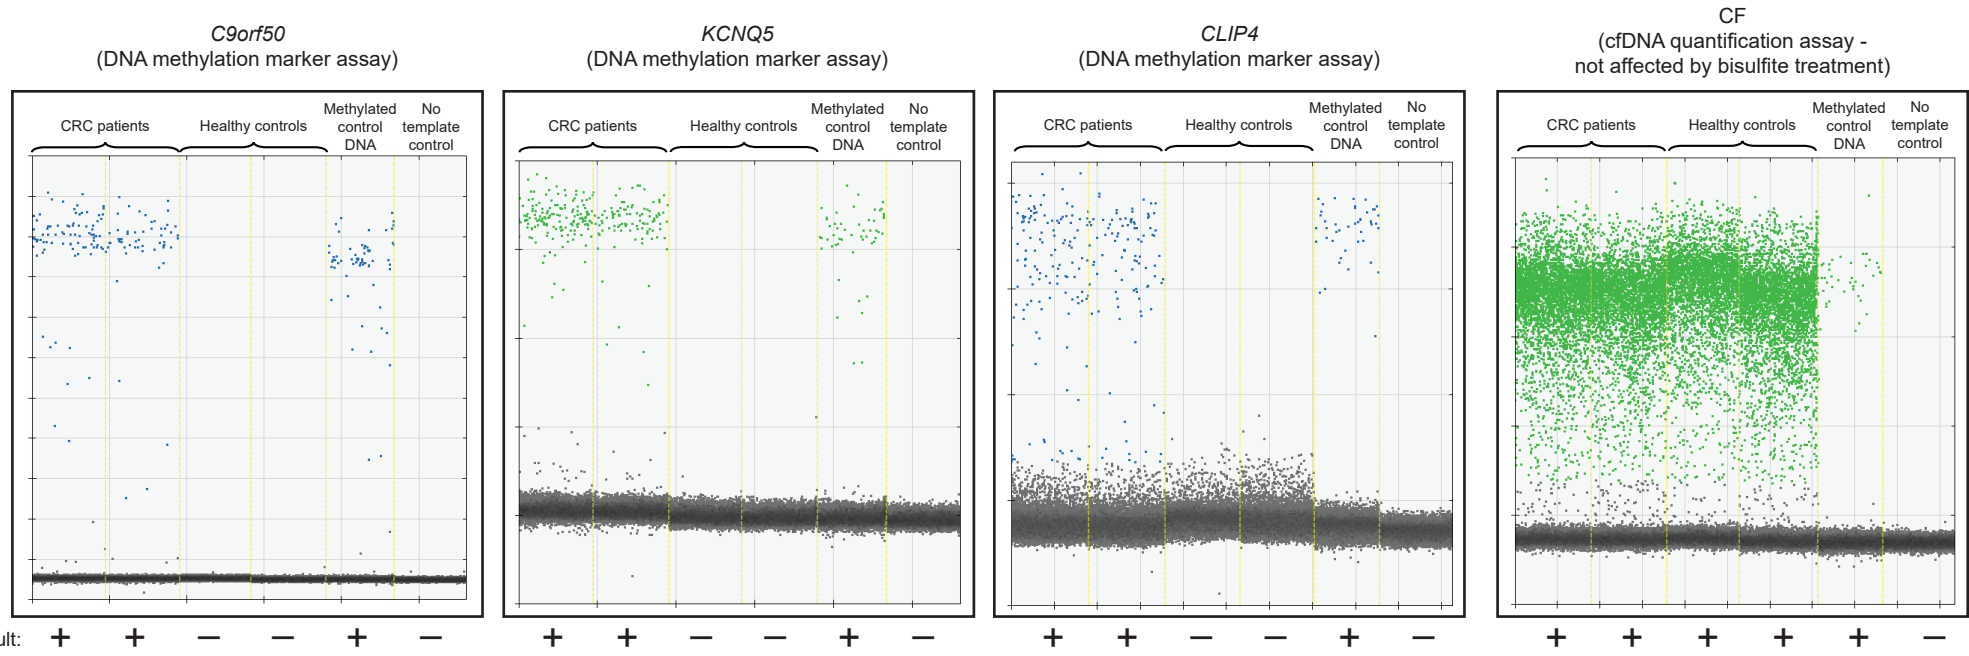

Supplement: 13148_2019_757_MOESM7_ESM.pdf [file 13148_2019_757_MOESM7_ESM.pdf]
